# Supplementary figures and images for: Lead DEAD/H box helicase biomarkers with the therapeutic potential identified by integrated bioinformatic approaches in lung cancer
Source: PubMed Central journal article supplement — Comput Struct Biotechnol J. 2020 Dec 28;19:261–78. doi: 10.1016/j.csbj.2020.12.007 (PMC7779375; doi:10.1016/j.csbj.2020.12.007), 2020-12-28

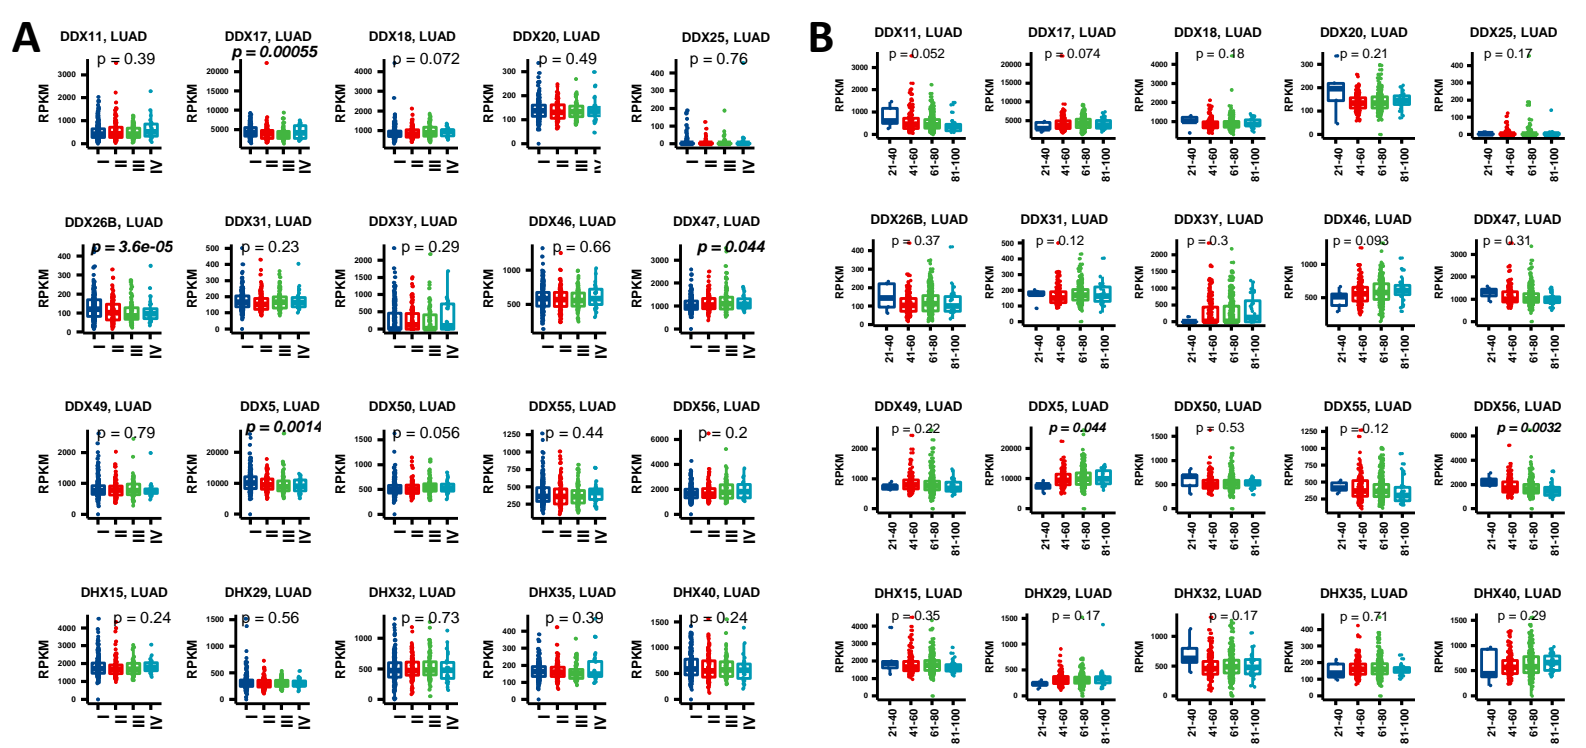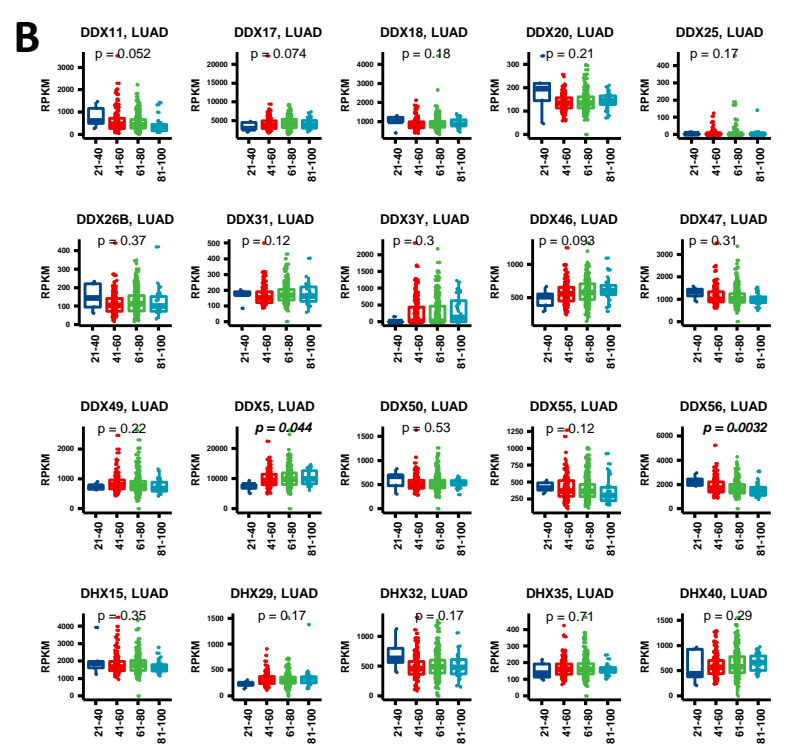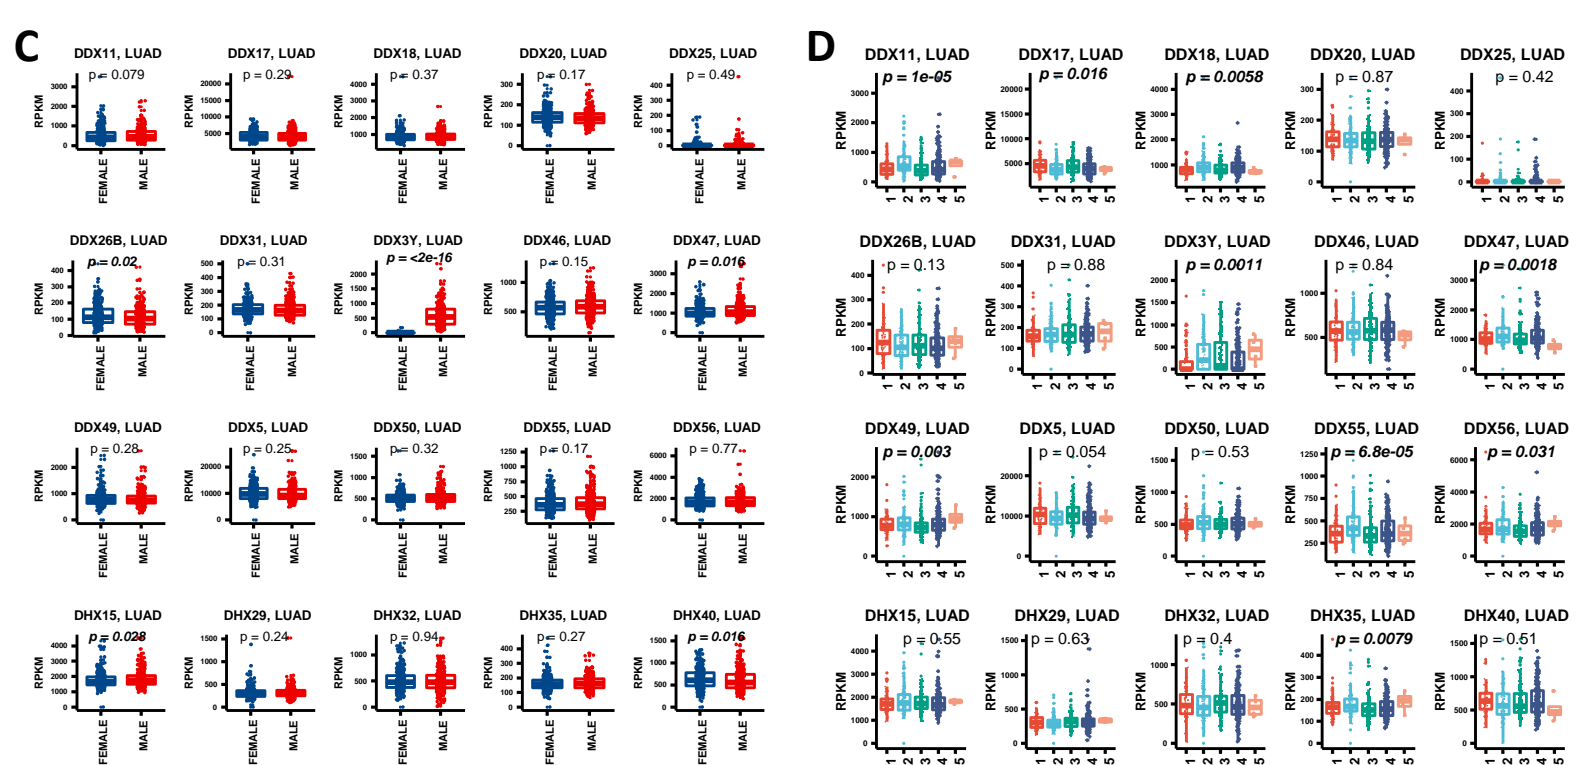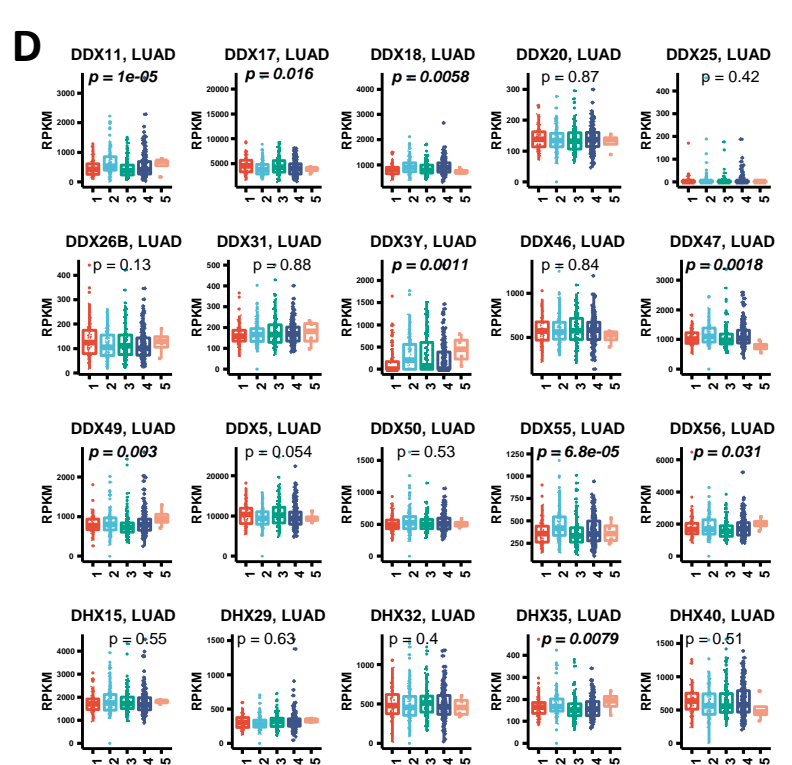

Supplement: mmc1.pdf [file mmc1.pdf]

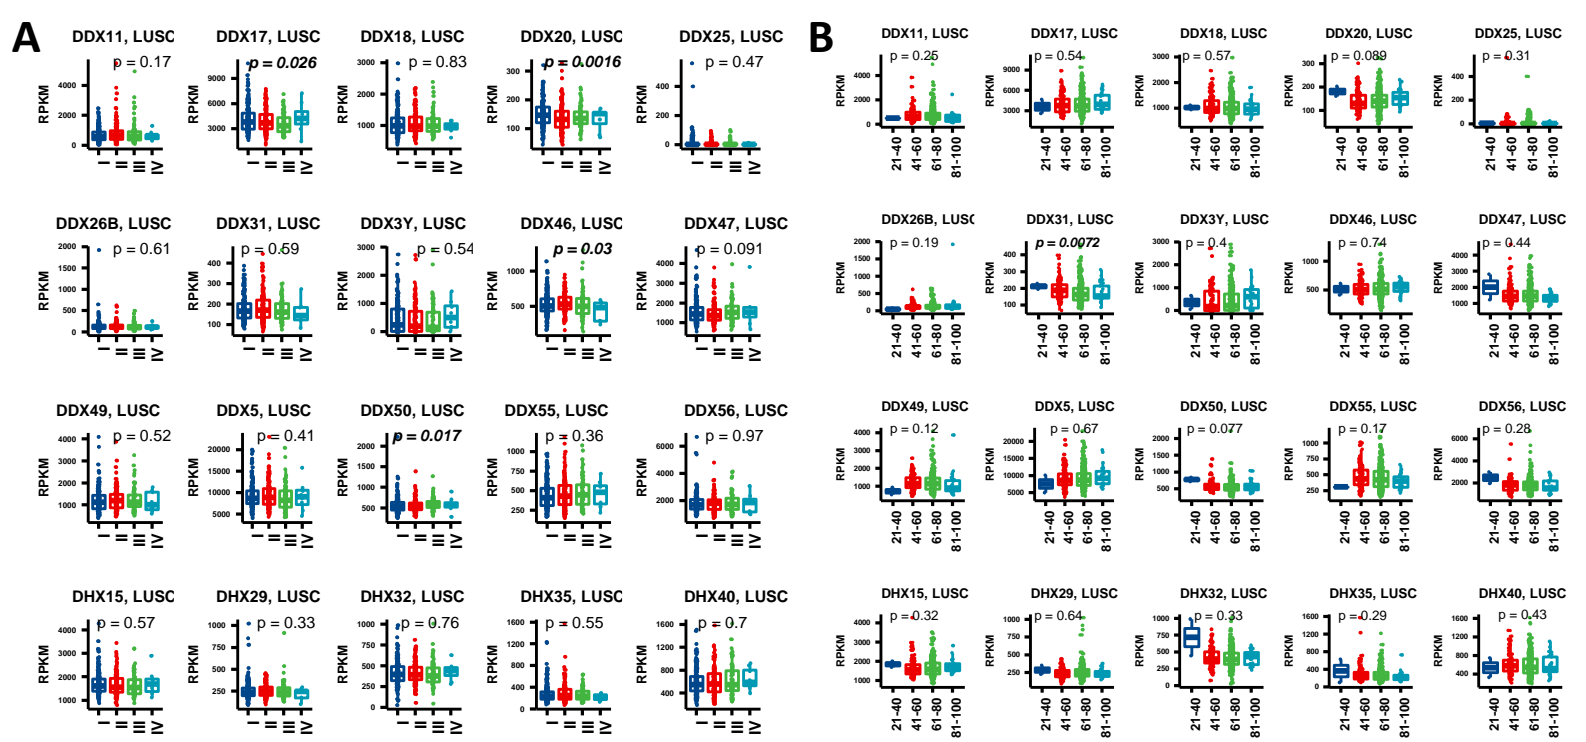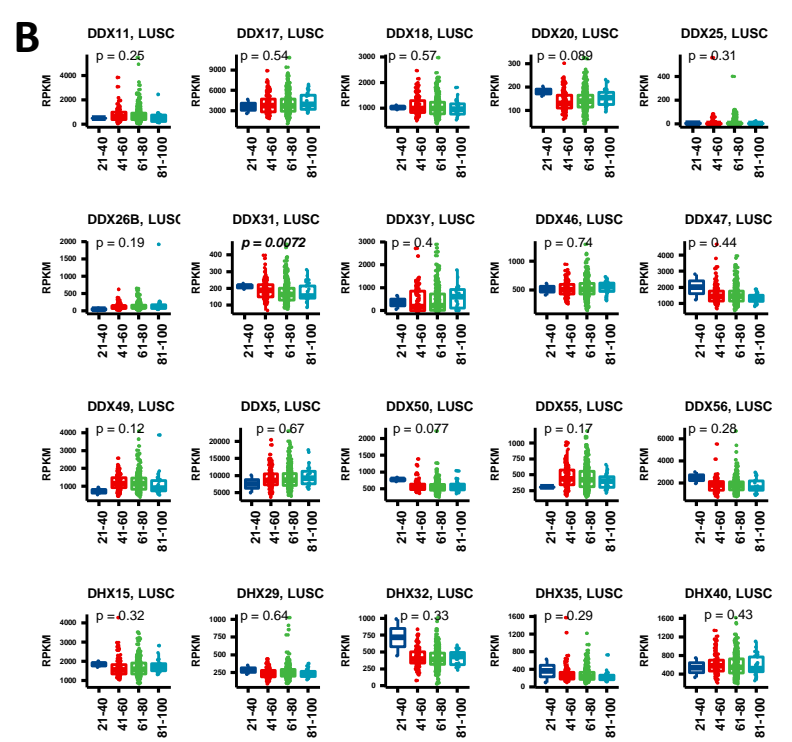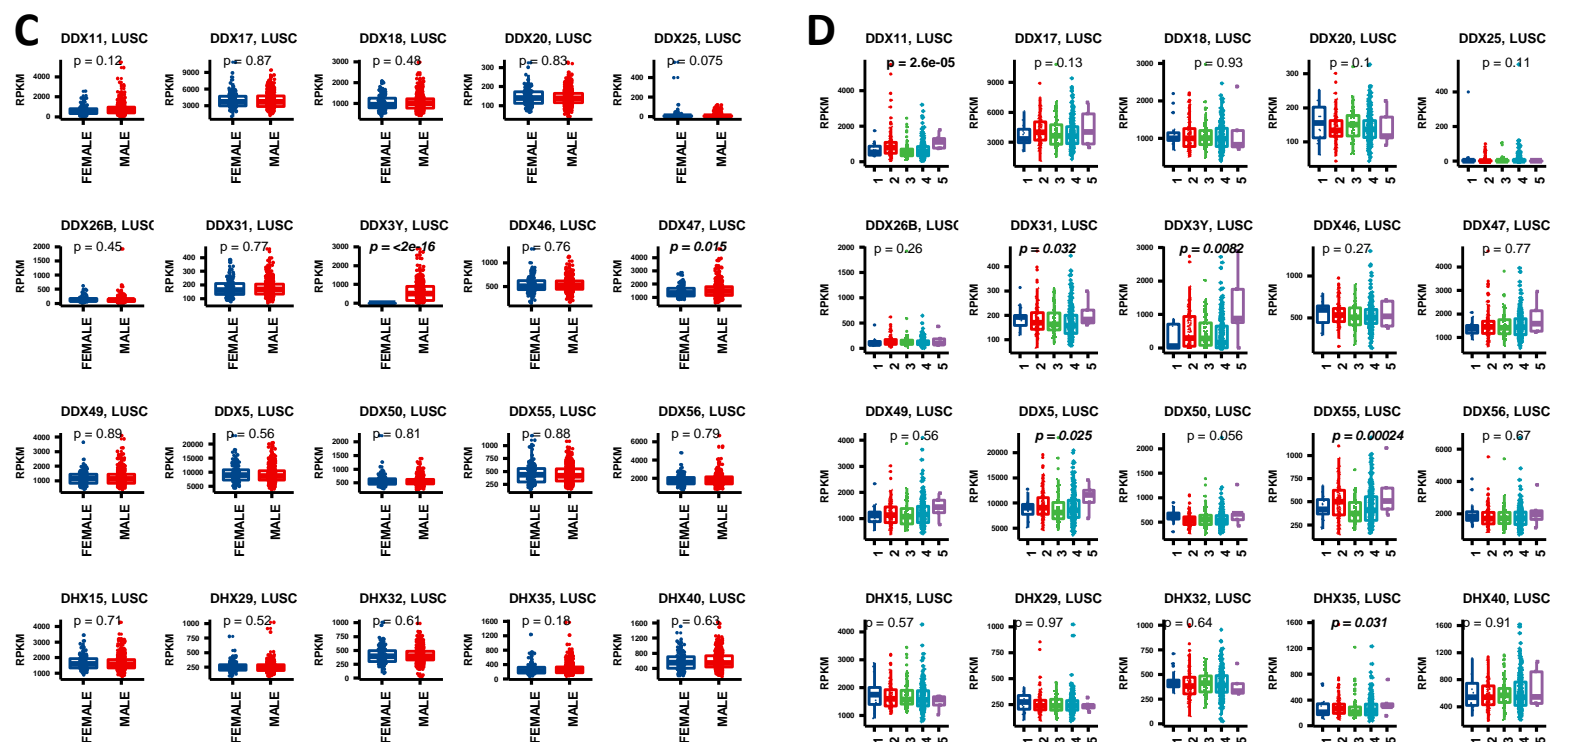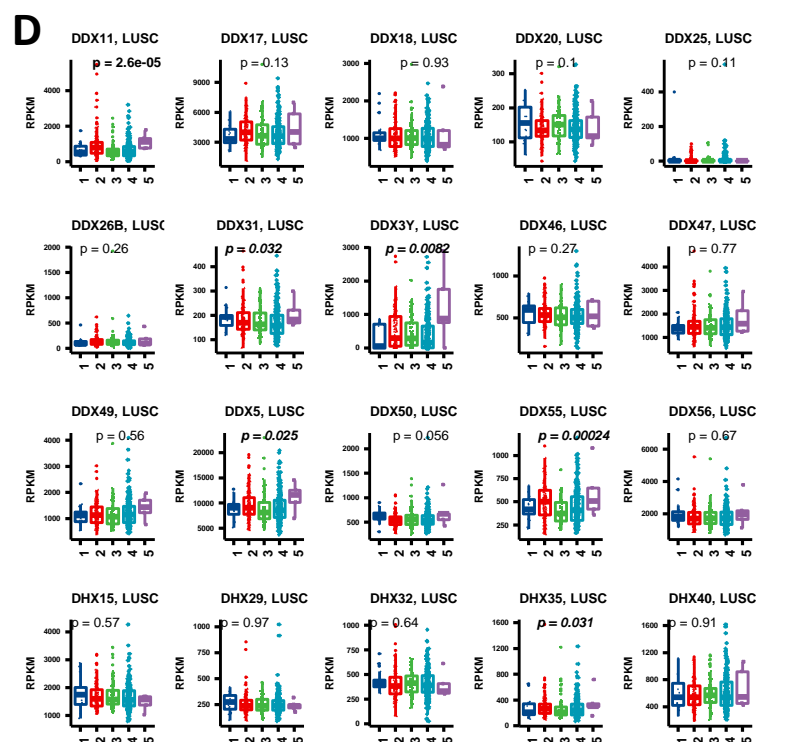

Supplement: mmc2.pdf [file mmc2.pdf]
